# Supplementary material for: Novel Polymeric Biomaterial Based on Naringenin
Source: MDPI journal article supplement (doi:10.3390/ma14092142), 2021-04-23
Supplement: s1 [file s1]

*Supplementary Materials*

# Novel Polymeric Biomaterial Based on Naringenin

Małgorzata Latos-Brozio <sup>1,\*</sup>, Anna Masek <sup>1</sup> and Małgorzata Piotrowska <sup>2</sup>

<sup>1</sup> Faculty of Chemistry, Institute of Polymer and Dye Technology, Lodz University of Technology, Stefanowskiego 12/16, 90-924 Lodz, Poland; anna.masek@p.lodz.pl

<sup>2</sup> Faculty of Biotechnology and Food Sciences, Institute of Fermentation Technology and Microbiology, Lodz University of Technology, Wólczarska 71/173, 90-924 Lodz, Poland; malgorzata.piotrowska@p.lodz.pl

\* Correspondence: malgorzata.latos@p.lodz.pl

Figure S1 a.  $^1\text{H}$  NMR spectra of poly(naringenin) in deuterated water.

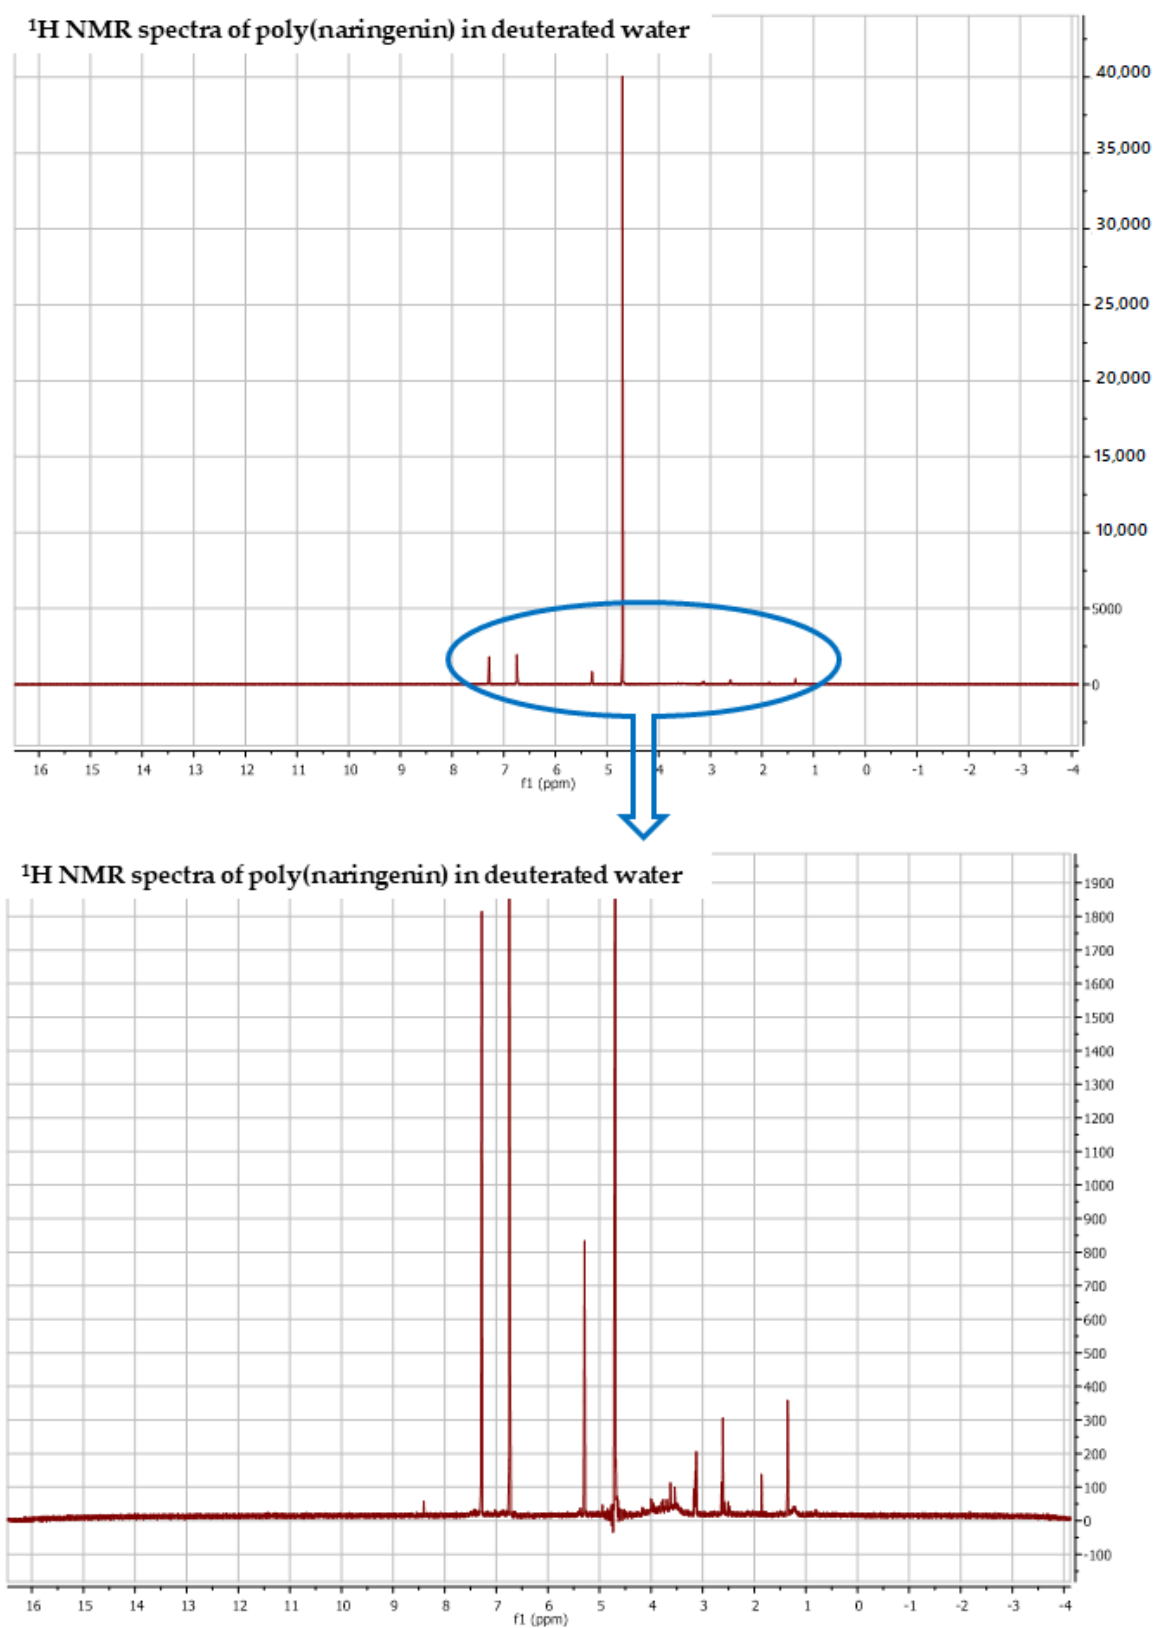

Figure S1a:  $^1\text{H}$ NMR spectra of poly(naringenin) in deuterated water.

**Figure S1 b.**  $^1\text{H}$  NMR spectra of poly(naringenin) in DMSO.

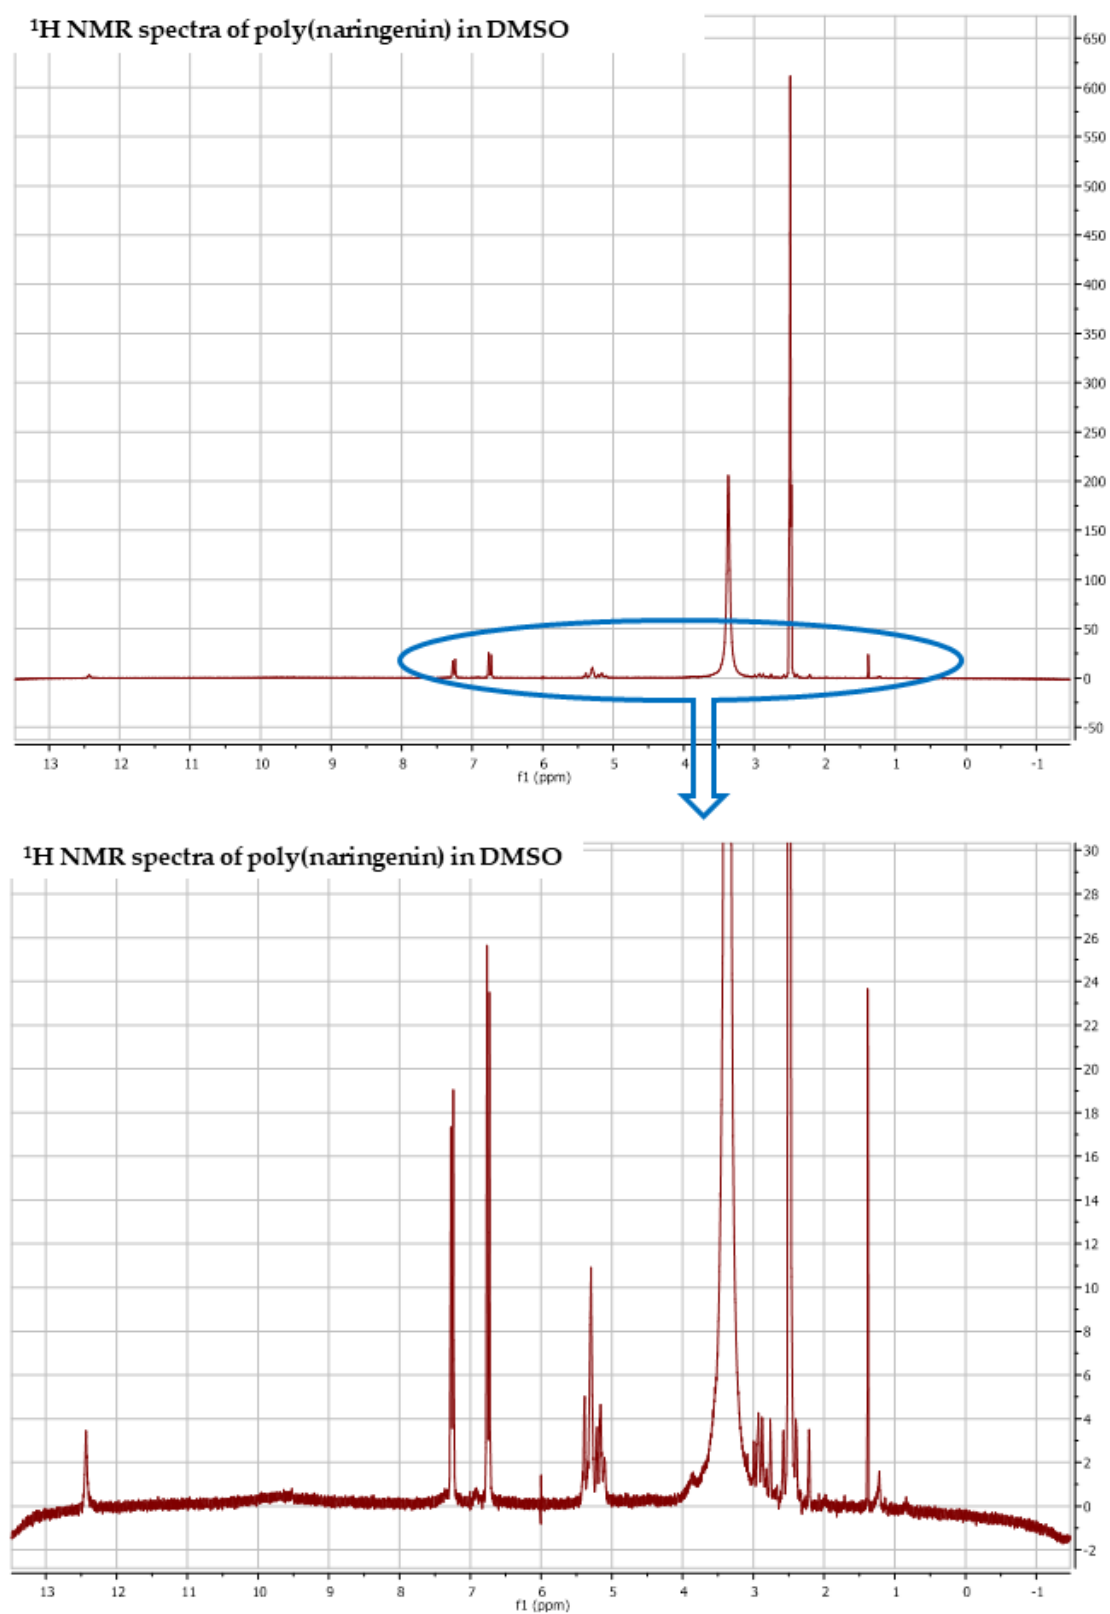

**Figure S1b:**  $^1\text{H}$ NMR spectra of poly(naringenin) in DMSO.
